# Supplementary material for: Liver-Targeted Fetal MSC-Derived Extracellular Vesicles: A Therapeutic Approach in a Mouse Model of Acute Hepatic Failure
Source: Research Square preprint supplement (doi:10.21203/rs.3.rs-7302374/v1), 2025-08-12
Supplement: Supplementary file 1 [file ec229ce2b3c3d0bac4cb8da1.docx]

**Development and overview of the protocol**

Our protocol presents a more accessible methodology for modifying the surface of EVs for targeted liver delivery, simplifying the process compared with existing complex manipulation techniques. The key steps in this protocol include the following:

1. Preparation of EV-depleted conditioned media (CM), including a step to remove EVs from fetal bovine serum (FBS), thereby increasing the purity of MSC-derived EVs in the CM (steps 1--11).
2. Utilization of commercially available bovine serum albumin (BSA) in the culture medium for albumin coating.
3. Removal of cells and cellular debris from the culture medium through a series of centrifugation steps (**Figure 1a**).
4. Labelling of EVs with PKH26 dye for tracking purposes (**Figure 1b**).
5. Establishment of the AHF mouse model with a single dose of CCl₄(**Figure 2**).
6. Administration of albumin-coated EVs via the tail vein.
7. Live imaging to assess the targeted biodistribution of EVs in animals.

**Applications of the method**

The utilization of EVs as therapeutic agents represents a significant advancement in addressing the constraints associated with MSC-based therapeutic applications. EVs confer numerous advantages, including the feasibility of large-scale production, ease of storage and enhanced batch-to-batch quality control[1]. In contrast to traditional cell-based methodologies, EVs can be effectively engineered through cargo manipulation for drug delivery and surface modification to improve their pharmacokinetic and pharmacodynamic properties[2]. This protocol is designed for the bulk extraction of secreted EVs from various cell sources, facilitating the identification of their cargo and biological functions, as well as exploring their potential use in biomarker discovery and therapeutic applications. We employ ultracentrifugation as the isolation method, as it is the most efficient way to obtain high yield, intact morphology and pure EVs while remaining cost effective for *in vivo* applications[3]. However, for clinical applications, other methods of isolation (i.e., filter-based methods) can also be utilized instead of ultracentrifugation in this step [4,5].

Previous studies have shown that i.v. administration of EVs in murine models results in rapid accumulation within the liver. The capacity of EVs to localize to the liver is significantly influenced by their surface profile, which plays a critical role in determining the efficiency of their cellular uptake[6]. Hepatic cells express a range of albumin receptors, each with a unique distribution *in vivo*, characterized by distinct albumin recognition sites[7]. Consequently, this protocol aims to enhance hepatic uptake by leveraging the albumin receptors on hepatocytes, facilitated by the albumin coating of EVs, thus overcoming the nonspecific biodistribution typically observed with uncoated EVs in the bloodstream[8].

Recent reports indicate that EVs coated with albumin exhibit an increased capacity to bind additional albumin in circulation, resulting in a prolonged half-life and an enhanced ability to reach target organs. With further refinement, this protocol holds promise for targeting specific cell type receptors, ultimately regulating the activation of different hepatocyte subtypes [8]. This approach has the potential to amplify the therapeutic effects of MSC-derived EVs in the context of AHF and various liver diseases.

**Materials**

**Biological Materials**

- Umbilical cord mesenchymal stromal/stem cells were isolated from the umbilical cord tissue of healthy female donors (Hellenic Cord Blood Bank, BRFAA).

**Caution**: The research conducted as part of this protocol complies with all the relevant ethical regulations. The use of the human samples was approved by the bioethics committee of the School of Medicine of the NKUA and the BRFAA.

**General laboratory reagents**

- PBS without calcium and magnesium, pH 7.4 (Gibco, cat. no. 14190-144)
- Alpha Minimum Essential Medium (A-MEM) (PAN-BIOTECH cat. no. P04-21350)
- Fetal bovine serum (FBS) (PAN-BIOTECH cat. no. P30-19375)
- PVDF membrane (Macherey Nagel cat. no 741260)
- ECL (Luminata Forte) (Millipore, Massachusetts, USA, WBLUF0100)
- Penicillin‒streptomycin (P/S) (100×, Gibco, cat. no. 15140122)
- L-Glutamine (100x, Gibco, cat. no.25030081)
- BSA (Sigma‒Aldrich Ltd. cat.no.9048-46-8)
- Ethyl alcohol (Merck Millipore, cat.no.100983)
- Methyl cellulose – uranyl acetate (Sigma‒Aldrich Ltd. cat.no 9004-67-5)
- Carbon tetrachloride (Sigma‒Aldrich Ltd., cat. no. 289116)
- PKH26-RED fluorescent cell linker (Merck-Millipore, USA MINI26-1KT)
- Harris Hematoxylin Solution (Sigma‒Aldrich Ltd., cat. no. HHS16)
- Eosin Y Solution (Sigma‒Aldrich Ltd., cat. no. HT110216)
- Formalin solution 10% (Sigma‒Aldrich Ltd., cat. no. HT501128)

**Equipment**

General Equipment

- Microcentrifuge (Sorvall Legend Micro 17R, Thermo Scientific, cat. no. 75-002-543)
- Superspeed Centrifuge (Sorvall RC-5C Plus, Thermo Scientific, cat. no. 8327-30-0001)
- UltraCentrifuge (Sorvall WX 100+, Thermo Scientific cat. no. 75000100)
- T-865 centrifuge rotor fixed-angle, (Thermo Scientific cat. no. 51411)
- SS34 centrifuge rotor fixed-angle, titanium (Sorvall, Thermo Scientific cat. no. 369694)
- Xenogen IVIS Lumina II System (Advanced Molecular Vision, Inc., UK)
- iBright CL750 Imaging System (Thermo Scientific, cat. no. A44116 USA)
- Direct Detect spectrometer (Millipore, cat. no. DDHW00010-WW)
- NanoSight NS300 instrument (Malvern Instruments, Amesbury, UK)
- Cabinet (Class II, Type A2 biological safety cabinet, Nuaire, cat. no. NU-425-400)
- NanoDrop One (Thermo Scientific, cat. no. 13-400-518)
- T-175 cell culture flask (175 cm2, SPL, cat. no. 71175)
- T-75 cell culture flask (75 cm2, SPL, cat. no. 70075.)
- 50 ml conical centrifuge tube (Thermo Scientific, cat. no. 339652)
- 15 ml conical centrifuge tube (Thermo Scientific, cat. no.339650)
- 1.5 ml centrifuge tube (Fisher Scientific, cat. no. 05-408-129)
- 10 ml pipette (serological pipette; SPL, cat. no. 91010)
- 5 ml pipette (serological pipette; SPL, cat. no. 91005)
- 25 ml pipette (serological pipette; SPL, cat. no. 91025)
- 5 ml syringe (Plastipak BD, cat. no. 309646)
- Syringe filter (Millipore, cat. no. SLGP033RS)
- Blood-collection tubes (Sarstedt AG & Co, cat.no. 41.1393.005)
- NuPAGE Bis-Tris gel (4–12%; Invitrogen, cat no. NP0322)

**Reagent setup**

70% (vol/vol) sterile ethanol

To prepare 1 liter of 70% (vol/vol) ethanol, 700 ml of pure ethyl alcohol was mixed with 300 ml of Milli-Q H2O. The mixture was filtered through a 0.22-μm filter and stored at room temperature (22°C) for ≤6 months.

Complete A-MEM (20% (vol/vol) FBS)

In a laminar flow hood, 100 ml of fetal bovine serum, 5 ml of L-glutamine (100×, 200 mM) and 5 ml of P/S (100×, 10,000 U/ml) were added to a bottle containing 400 ml of Α-MEM. The mixture was mixed thoroughly, filtered and stored at 4°C for ≤1 week.

**Procedure**

**Preparation of EV-depleted CM**

TIMING: overnight (16 h)

1. This initial step is crucial for the elimination of EVs derived from FBS.
2. Prepare 50 mL of complete A-MEM by adding 20% FBS, 1% P/S, and 1% L-glutamine.
3. Filter the medium through a 0.22 μm filter to prevent contamination.
4. Distribute the media evenly into three tubes, ensuring that each tube is identical in weight.
5. Adjust the media in each tube, if necessary, to achieve equal weight.

Critical: Confirm that all three tubes are balanced to prevent complications during ultracentrifugation, which could damage the equipment.

1. Centrifuge at 100,000 × *g* for 16 hours (overnight) at 4°C using a cold T-865 rotor (Sorvall/WX 100+, MA, USA).
2. Once centrifugation is completed, carefully remove the tubes from the centrifuge.
3. Gently collect the supernatant, ensuring minimal disturbance of the EV pellet at the bottom of the tube. The supernatant should now be devoid of EVs.
4. Transfer the supernatant to a clean 50 ml Falcon tube.
5. Filter the collected EV-depleted supernatant through a 0.22 μm filter to eliminate any potential contaminants.
6. Store the filtered EV-depleted medium at 4°C for future use.

# **Isolation of liver-****specific EVs derived from fetal MSCs via ultracentrifugation**

TIMING: 3 weeks

This step delineates the process of culturing cells to produce CM, which serves as the source of EVs, followed by their isolation through high-speed ultracentrifugation (**Box 1**).

Critical: Perform Steps 12–16 in a Class II, Type A2 biological safety cabinet (Nuaire).

1. Seed 5 × 10⁶ cells of interest (in this case, UC-MSCs) into a 175T flask, adding 20 mL of warm (37°C) complete A-MEM medium, as specified in the reagent setup. Place the flask in a 5% CO2 incubator at 37 °C.

Note: Regularly check the cells for mycoplasma contamination. Access cell viability using trypan blue exclusion method.

1. Culture cells further until flask reaches 90% confluency, typically within 48 h, depending on the growth rate and seeding density.
2. Wash the cells twice with 5 mL of 1x PBS to remove residual FBS from the conditioned media.

Critical: The number of T175 flasks required depends on the intended scale of preparation for downstream applications. A standard set up for comprehensive profiling and functional *in vivo* assays typically employs 3 x 175T flasks; however, smaller setups can suffice for biochemical and molecular characterization.

1. Starve cells in 17 ml A-MEM supplemented with EV-depleted FBS at a final concentration 0.5% and 2.5 μg of BSA for 48 h in a 5% CO2 incubator at 37°C.

Critical: This starvation step is essential for EV isolation, facilitating cellular growth while minimizing stress. Although efforts can be made to reduce FBS EV contamination, some residuals may persist. If contamination concerns remain high, the use of serum-free medium should be considered (**Box 2**).

Critical: Filtrate the EV-depleted medium prior to use, first with a 0.45 μm filter and then with a 0.22 μm filter to avoid contamination from BSA.

1. Collect CM from all flasks and transfer into a 50 mL Falcon tube.
2. Centrifuge the CM at 500 × g for 10 min at 4°C to pellet the cells and cellular debris.
3. Decant the supernatant into a new 50 mL Falcon tube, discarding the pellet.
4. Centrifuge the supernatant at 2,000 × g for 10 min at 4°C to remove cell debris and apoptotic bodies, after which the pellet is discarded.

Critical: This step must be performed immediately after centrifugation to prevent pellet dispersion.

1. Transfer the supernatant to a new 50 ml Falcon tube, leaving 0.5 ml above the pellet to minimize contamination, and the pellet was discarded.
2. Centrifuge the supernatant at 10,000 × g for 30 min at 4°C in an SS-34 fixed angle rotor (Sorvall/RC-5C Plus, MA, USA) to eliminate large EVs. Discard the pellet.
3. Transfer the supernatant to ultracentrifuge tubes.

Note: Prior to use, sterilize the tubes, by rinsing them with pure ethanol and exposing them to ultraviolet light for a few minutes.

Critical: Ensure that the ultracentrifuge tubes remain balanced, following steps 4--5.

Critical: Filling ultracentrifuge tubes to an adequate volume is essential to prevent collapse and ensure optimal EV recovery.

1. Set the centrifuge to 100,000 × g and centrifuge for 2 h at 4°C in a cold T-865 fixed angle rotor.

Note: Conduct the entire isolation procedure at 4°C to maintain the integrity and functionality of the proteins and the nucleic acids within the EVs.

Troubleshooting (see the Troubleshooting table)

1. Upon completing centrifugation, carefully remove the tube from the centrifuge.
2. Gently collect the supernatant while avoiding disturbance to the EV pellet at the bottom of the tube.

Troubleshooting (see the Troubleshooting table)

1. Carefully transfer the supernatant into a fresh 50 mL tube and filter it through a 0.22 μm filter to eliminate any remaining contaminants.
2. Centrifuge the filtered supernatant at 500 × g for 10 min at 4°C to pellet any residual and apoptotic cells, retaining this as a negative control.
3. Add PBS (1x) to the EV pellet until the tubes are approximately filled to 20 ml, then repeat the steps 4-5 to ensure proper balance.
4. Centrifuge at 100,000 × g for 2 h at 4°C, removing any residual medium to further purify the EV-pellet.

Troubleshooting (see the Troubleshooting table)

1. Upon completion of centrifugation, carefully remove the tube from the centrifuge.
2. Resuspend the pellet of EVs in 150 μL of 1x PBS.

Troubleshooting (see the Troubleshooting table)

Note: The volume of buffer added may vary on the basis of the preparation size, the cell line and the downstream applications. For example, when EVs are isolated from 3 × 175 T flasks of UC-MSCs, resuspension is typically achieved in 150 μL of 1× PBS.

1. Store the EV sample at -80o C for future use.

Note: If flasks are to be reused for EV isolation, fresh complete medium should be added until the cells recover (over a period exceeding 2 weeks) before the procedure is repeated.

Pause Point: Depending on the intended downstream application, the EV sample can be stored at 4°C for short-term use (such as for characterization, including immunoblotting, electron microscopy, NTA) or at −80°C for long-term storage or can be utilized immediately.

| **BOX 1**. Optional protocol for EV isolation by ultrafiltration |
| --- |
| An alternative to the “gold-standard” ultracentrifugation method for EV isolation is ultrafiltration followed by a size exclusion chromatography step. This method offers practical advantages, including reduced processing time, lower equipment costs, and greater accessibility, making it suitable for laboratories without high-speed ultracentrifuges [9]. Ultrafiltration is also favoured in clinical settings due to its scalability, speed and compatibility with Good Manufacturing Practice (GMP) workflows. It enables efficient EV concentration with minimal structural damage. However, ultrafiltration may coenrich protein aggregates, cause membrane fouling, or result in the loss of small EVs, potentially compromising purity and reproducibility [10]. In contrast, ultracentrifugation yields high-purity EVs through sequential steps, including density gradients, but is time-consuming, equipment-intensive and may impact EV integrity due to high shear forces. Therefore, the choice between these methods should be guided by downstream application needs, balancing yield, purity and scalability. |

| **BOX 2**. Optional protocol modification for using serum free medium containing EV-depleted bovine serum |
| --- |
| An alternative strategy for isolating EVs is the utilization of serum-free medium instead of EV-depleted bovine serum medium. While this approach effectively mitigates the risk of contamination from bovine-derived EVs and RNA-protein complexes, it also presents several challenges. The absence of serum may result in the omission of vital growth factors essential for maintaining cell viability and growth, potentially adversely affecting cell health, proliferation and overall function. Such conditions could lead to increased cell stress or altered metabolic states, thereby impacting the characteristics of the EVs produced. Furthermore, cells cultured in serum-free conditions may generate EVs with differing compositions compared to those cultured in serum, which could influence subsequent analyses regarding the EVs’ content, function and purity. Therefore, there is no universally optimal solution; researchers must weigh the benefits and drawbacks of serum-free versus EV-depleted serum based on the specific downstream analyses they intend to conduct.  Procedure  In a laminar flow hood, take a bottle containing 500 ml of A-MEM medium, add 5 ml L-glutamine (100×, 200 mM) and 5 ml of P/S (100×, 10,000 U/ml). Mix thoroughly, then filter the solution and store at 4°C for ≤1 week. |

# **Labelling EVs with PKH26 dye**

TIMING: 3 h

1. Start with freshly isolated EVs obtained via ultracentrifugation according to the established EV isolation protocol detailed in steps 1--32.
2. Resuspend 10 µg of isolated EVs in 20 µL of PBS (1x).
3. To the EV sample, add 80 µL of Diluent C. Mix thoroughly by pipetting to ensure uniform distribution of the sample.

Note: It is crucial that EVs are allowed to remain in Diluent C for extended periods, as this could affect the integrity of the vesicles.

1. Prepare the PKH26 dye solution by adding 100 µL of Diluent C to a new tube, followed by the addition of 0.8 µL of PKH26 dye (8 µM concentration). Mix gently but thoroughly to ensure complete dissolution of the dye.

Critical: The dye solution should be freshly prepared and utilized immediately to achieve optimal staining.

1. Mix equal volumes of freshly prepared PKH26 dye solution and EV samples to ensure uniform staining.
2. Incubate the mixture on ice for 1-5 min, gently mixing the solution periodically to ensure even distribution of the dye across all EVs.

Note: Staining occurs rapidly; extended incubation times do not confer additional benefits.

1. After incubation, add 100 µL of 10% EV-depleted FBS in A-MEM to the stained EV sample to terminate the staining reaction.

Note: Alternatively, a protein solution, such as 1% BSA, can be used instead of EV-depleted FBS to prevent nonspecific binding and stabilize the sample further.

Critical: Avoid the use of serum-free media or buffered salt solutions, as these can lead to the formation of cell-associated dye aggregates, which serve as slow-release reservoirs for unbound dye and are difficult to remove during washing.

1. Centrifuge the stained EV- sample at 100,000 × g for 80 min at 4°C in a cold T-865 fixed angle rotor (Sorvall/WX 100+, MA, USA) to pellet the EVs.
2. After centrifugation, carefully discard the supernatant, leaving the pellet intact.

Troubleshooting (see the Troubleshooting table)

1. Resuspend the EV pellet in 50 µL of 1x PBS to obtain a final concentrated sample of stained EVs.

Troubleshooting (see the Troubleshooting table)

# **Characterization of EVs by NTA**

TIMING: 2-3 days

This section delineates the identification of EV characteristics, including the morphology, concentration and size of individual particles.

1. Activate and assemble NTA instrument, ensuring it is thoroughly cleaned and rinsed with ultrapure water followed by PBS to eliminate any contaminating particles that may reside in the sample line.
2. Dilute the EVs in particle-free PBS, to achieve a concentration within the recommended measuring range (1–10 x 108 particles/mL), which corresponds to a 1:100 dilution of the original sample concentration.
3. Collect the diluted EVs into a 1 mL syringe ensuring that all air bubbles are removed by gently tapping and/or pushing out the air bubbles.

Note: It is essential to use PBS at RT, which is filtered through a 0.22 μm filter and free of air bubbles, to avoid the detection of nonspecific events/particles. The instrument is considered clean when fewer than 5 particles per frame are detected during rinsing with clean PBS. The syringe is inserted into an automated syringe pump unit. The camera is focused so that the particles are clearly visible, and the instrument settings are adjusted according to each sample, including the camera gain, threshold and flow rate (guidelines for these settings are typically provided during instrument training).

1. Capture 5 recordings, each lasting 30 sec.

Note: The recordings were conducted under the following conditions: cell temperature: 25°C, syringe speed: 100 mL/s.

1. Analyze the recordings using the Nanosight software to estimate the size and number of particles. Clean the sample line with fresh PBS and prepare to measure another sample.

# **Characterization of EVs by immunoblotting** **analysis**

TIMING: 2 days

This section will subject the EV samples to immunoblotting analysis using various antibodies as specific markers.

1. Determine the protein concentration of each EV sample using a BCA protein assay kit according to the manufacturer's protocol.
2. Add loading buffer (4x) to each sample and incubate at 95°C for 10 min.

Note: Each sample is expected to contain an average EV concentration of 20-25 μg.

1. Pour Running buffer (1x) into the casting frame to fill the wells of the 12% gel. Resolve the lysates by SDS-PAGE.
2. Conduct the electrophoresis at 70 V for 30 min, followed by 90 V for 1 h.
3. Transfer the gel to a PVDF membrane with a pore size of 0.45 μm, conducting the transfer at 300 mA for 1 h.

Note: Prior to transfer, the PVDF membrane must be rinsed with methanol (for 30 sec), water (for 2 min) and transfer buffer (15 min).

1. Block the membrane in TBS-T (1x) containing 5% non-dry fat milk under shaking for 1 h at RT.
2. Incubate the membrane with selected primary antibodies diluted in TBS-T (1x) or TBS (1x) at the concentrations recommended by the manufacturers overnight at 4°C.
3. Rinse the membrane using TBS-T (1x) under shaking for 10 min at RT, repeating this step two additional times.
4. Incubate the membrane with the appropriate HRP-conjugated secondary antibody diluted in TBS-T (1x) while shaking for 1 h at RT.
5. Rinse the membrane using TBS-T (1x) with shaking for 10 min at RT, repeating for two additional times.
6. Incubate the membrane with enhanced chemiluminescence (ECL) reagent and scan the images using a chemiluminescent imaging device.

Note: The iBright CL750 Imaging System is utilized for imaging.

# **Characterization of EVs by transmission electron microscopy** **(TEM)**

TIMING: 1 day

This section will subject the EV samples to TEM.

1. Fix 5 μL of EV samples at a 1:1 ratio with 4% paraformaldehyde overnight at 4°C.
2. Place the fixed EV samples onto a 300-mesh copper grid with a carbon-coated Formvar film and incubate for 20 min.
3. Rinse grid x3 with PBS.
4. Incubate with 1% glutaraldehyde for 5 min.
5. Rinse with dH2O.
6. Stain with uranyl oxalate for 5 min on ice.
7. Stain with methyl cellulose-uranyl acetate for 10 min on ice.
8. Remove excess liquid using Whatman filter paper along the sides.
9. Allow the grids to dry for a few minutes at RT before proceeding to TEM analysis.

Note: If stored for an extended period, the copper grid can be placed in a clean and dry container to avoid contamination and damage.

# **Establishment of an *in vivo* mouse model with the AHF phenotype (Day 1)**

TIMING: 1 day

This section outlines the development of an *in vivo* AHF mouse model in previous publications[11–14].

Note: Immunodeficient female Rag 1-/- C57BL/6 mice are particularly susceptible to serious metabolic disorders under specific circumstances. In particular, they present conditions such as hyperinsoulinemia, insulin resistance, high lipogenesis, hepatic steatosis and intracellular lipid accumulation, rendering them an appropriate mouse model for the study of liver disorders. This animal model was implemented at this stage.

Note: Carbon tetrachloride (CCL₄) is a hepatotoxic agent that induces liver injury and is commonly employed in hepatic fibrosis models.

Note: CCL₄ is dissolved in oil rather than in a water-based solvent because it is nonpolar; in this protocol, sun oil is used.

Critical: Prior to injection, weight measurements were obtained from the mice to accurately calculate the dosage of CCL₄.

1. Weigh the mice and assess them for signs of discomfort (i.e., changes in respiration, rough hair coat, unusual behavior, and hunched posture). Exclude any animals exhibiting such abnormalities from the study.
2. Prepare the CCL₄/Sun oil solution at RT.

Note: CCl₄ should be diluted on the day of administration and thoroughly mixed with the sun oil. For example, 10 µL of CCl₄ dissolved in 90 µL of sun oil can be administered to a 20 g mouse, resulting in a final dosage of 0.5 μL CCl₄/g body weight.

Critical: The CCL₄/sun oil solution has a viscous consistency; hence, it is advisable to prepare sufficient solutions for n+2 animals.

Note: Ensure the use of a sterile syringe for injections to each animal.

Note: Tap the syringe and slowly squeeze the plunger to expel the air; then, set the syringe aside and in preparation for the injection.

1. Disinfect the abdomen surface of mice with 70% ethanol.
2. Gently immobilize the neck of the mouse using the index and thumb, whereas the pink and ring fingers stabilized the animal.
3. Inject i.p. 100μL of the CCl₄/sun oil solution at a dosage of 0.5 mL/kg body weight per mouse.

Critical: CCl₄ is a known liver toxin with mild mucosal irritation and anesthetic effects on the central nervous system. In the event of skin contact, contaminated clothing should be immediately removed, the area should be rinsed with ample running water, and medical attention should be sought.

1. Administer an i.p. injection of 100 μL sun oil alone to control animals.
2. Re-examine the animals 1- hour postinjection for any signs of abnormalities.

# **Administration of PKH26 EVs to the AHF- mouse model (Day 2)**

TIMING: 1 day

This next step describes the administration of PKH26 EVs 24 h after the induction of the AHF-like phenotype in CCl₄mice.

1. Prepare the EVs/PBS solution.
   1. Dilute 20 μg of EVs from step 42 in PBS to a final volume of 200 μL.

Note: If the concentration of the EV sample is 0.5 μg/μL, add 40 μL from the sample to 160 μL PBS.

1. Administer an i.v. injection of a final volume of 200 μL of the EV sample.
2. Inject i.v. 200 μL PBS into control animals.

#

# **Collection of blood and liver tissue (Day 3)**

# Blood and liver tissue were collected following euthanasia of the experimental model mice.

TIMING: 1 day

This section outlines the procedure according to the FELASA and AVMA guidelines for humane and ethical animal experimentation for collecting blood and liver tissue for each experimental condition 24 h after EV treatment[15,16].

1. Deeply anesthetize mice via i.p. injection of a combination of ketamine (100 mg/kg) and xylazine (10 mg/kg).
2. Confirm surgical plan of anesthesia by absence of the pedal reflex before proceeding.
3. Place the mouse in the supine position and secure all four limbs to a sterile dissection plate.
4. Decontaminate the thoracoabdominal area using 70% ethanol.
5. Use sterile forceps to lift the abdominal skin and make a midline incision through the skin and peritoneum via surgical scissors, exposing the thoracic cavity.
6. Carefully open the rib cage to expose the heart.
7. Insert a 25–27G needle into the left ventricle of the heart, with the bevel up, and slowly withdraw blood (~0.8–1.2 mL).
8. Transfer the blood into tubes pre-filled with EDTA for differential blood count analysis or into heparinized tubes for clinical chemistry analysis.

Note: This is a terminal procedure; cardiac puncture must be performed only under deep anaesthesia or immediately postmortem and never on conscious animals.

Critical: Emphasize humane endpoints and minimize animal stress.

1. Centrifuge blood samples at 13,000 × g for 5 min.
2. Carefully collect the serum phase for the assessment of AST and ALT levels with an automated biochemical analyser.
3. Observe the number of macroscopically visible lipid droplets in the liver and the degree of colouration.
4. Rapidly excise liver tissue from the mouse.
5. Rinse the liver in a Petri dish filled with ice-cold PBS (1x).

Critical: Tissue harvesting must be performed swiftly.

1. Resection of the large lobe of the liver for subsequent analyses.
   1. For protein and RNA isolation, place a piece of fresh tissue in an Eppendorf tube and immediately immersed in liquid nitrogen.
   2. For histochemistry, immerse a slightly larger piece of tissue in 10 % formalin for 24 h, followed by a 10-minute wash with tap water and then incubation in 70% ethanol for 24 h prior to embedding in paraffin. Perform paraffin embedding and cut 5 µm sections on slides for subsequent histopathological examination.

Note: It is imperative to maintain consistency by keeping the same liver lobe in each tissue sample.

**Timing**

Steps 1–11, EV-depleted medium preparation: 20 h

Steps 12--15, Cell growth and medium collection: variable (dependent on the proliferation rate and number of flasks utilized for medium collection)

Steps 16--32, Isolation of EVs from cell-conditioned medium: 7 h

Steps 33–42, EV-labelling with PKH26 dye: 7 h

Steps 43–47, Characterization of EVs with NTA analysis: 1 h

Steps 48--58, Characterization of EVs by immunoblotting analysis: 24 h

Steps 59--67, Characterization of EVs by TEM: 24 h

Step 68--74, Establishment of *in vivo* AHF- mouse model: 1 h

Steps 75--77, Administration of EV treatment to an *in vivo* mouse model: 1 h

Steps 78--91, Euthanasia: 2 h

**Table 1. Troubleshooting table**

| **Step** | **Problem** | **Possible reason** | **Solution** |
| --- | --- | --- | --- |
| 25, 31, 41 | **Low yield of EVs** | Low cell density when the CM was collected | Increase cell density before collecting the CM (~90% confluency). |
| The EV pellet is invisible after 100,000*g* centrifugation | Use a higher volume of CM to improve pellet detection. |
| Insufficient number of cells producing EVs | Isolate EVs from a higher number of cells (90% confluency) |
| Short incubation time before collecting the CM. | Extend incubation time (e.g., 24–48 hours) for enhanced EV secretion |
| Cell stress or poor culture conditions leading to reduced EV secretion | Optimize culture conditions (e.g., pH, glucose levels, serum starvation if applicable). |
| 25, 31, 41 | **Very high yield of EVs from cell culture** | The CM harvested from cells may contain FBS | Prepare EV-depleted medium (ultracentrifugation at 100.000 x g, 4oC, overnight) |
| Wash flasks twice with PBS before adding the EV-depleted medium |
| 25, 31 | **The EV-pellet is hardly detectable after ultracentrifugation** | Low concentration of EVs in the medium. | Isolate EVs from a larger volume of medium |
| Concentrate your sample before ultracentrifugation |
| 29 | **Isolation of non-EV particles** | Co-isolation of contaminants such as protein aggregates, lipoproteins | Sequential centrifugations |
| 23, 29, 31, 42 | **Loss of EV integrity** | Harsh centrifugation conditions (too high speed or time) | Optimize centrifugation parameters |
| Inappropriate resuspension | Use gentle handling |
| Exposure to non-ideal temperatures/buffers. | Perform ultracentrifugation at 4°C |

**References**

1. Guo N, Wang Y, Wen Z, Fan X. Promising nanotherapeutics of stem cell extracellular vesicles in liver regeneration. Vol. 26, Regenerative Therapy. Japanese Society of Regenerative Medicine; 2024. p. 1037–47.

2. McLaughlin C, Datta P, Singh YP, Lo A, Horchler S, Elcheva IA, et al. Mesenchymal Stem Cell-Derived Extracellular Vesicles for Therapeutic Use and in Bioengineering Applications. Cells. 2022;11(21): 3366.

3. Shami-Shah A, Travis BG, Walt DR. Advances in extracellular vesicle isolation methods: a path towards cell-type specific EV isolation. Extracell Vesicles Circ Nucl Acids. 2023;4(3):447–60.

4. Brennan K, Martin K, FitzGerald SP, O’Sullivan J, Wu Y, Blanco A, et al. A comparison of methods for the isolation and separation of extracellular vesicles from protein and lipid particles in human serum. Sci Rep. 2020;10(1).

5. Akbar A, Malekian F, Baghban N, Kodam SP, Ullah M. Methodologies to Isolate and Purify Clinical Grade Extracellular Vesicles for Medical Applications. Cells.2022; 11(2):186.

6. Liam-Or R, Faruqu FN, Walters A, Han S, Xu L, Wang JTW, et al. Cellular uptake and in vivo distribution of mesenchymal-stem-cell-derived extracellular vesicles are protein corona dependent. Nat Nanotechnol. 2024;19(6):846–55.

7. Ishima Y, Maruyama T, Otagiri M, Chuang VTG, Ishidaa T. The New Delivery Strategy of Albumin Carrier Utilizing the Interaction with Albumin Receptors. Chemical and Pharmaceutical Bulletin (Tokyo). 2022;70(5):330–3.

8. Kamm DR, McCommis KS. Hepatic stellate cells in physiology and pathology. Journal of Physiology. 2022;600(8):1825–37.

9. Shu S La, Allen CL, Benjamin-Davalos S, Koroleva M, MacFarland D, Minderman H, et al. A Rapid Exosome Isolation Using Ultrafiltration and Size Exclusion Chromatography (REIUS) Method for Exosome Isolation from Melanoma Cell Lines. In: Methods in Molecular Biology. Humana Press Inc.; 2021;2265:289-304

10. Kornilov R, Puhka M, Mannerström B, Hiidenmaa H, Peltoniemi H, Siljander P, et al. Efficient ultrafiltration-based protocol to deplete extracellular vesicles from fetal bovine serum. J Extracell Vesicles. 2018;7(1).

11. Nikokiraki C, Psaraki A, Roubelakis MG. The Potential Clinical Use of Stem/Progenitor Cells and Organoids in Liver Diseases. Cells. 2022;11(9).

12. Zagoura DS, Trohatou O, Bitsika V, Makridakis M, Pappa KI, Vlahou A, et al. AF-MSCs fate can be regulated by culture conditions. Cell Death Dis. 2013;4(4).

13. Psaraki A, Zagoura D, Ntari L, Makridakis M, Nikokiraki C, Trohatou O, et al. MFGE-8 identified in fetal mesenchymal-stromal-cell-derived exosomes ameliorates acute hepatic failure pathology. iScience. 2023;26(11).

14. Psaraki A, Ntari L, Karakostas C, Korrou-Karava D, Roubelakis MG. Extracellular vesicles derived from mesenchymal stem/stromal cells: The regenerative impact in liver diseases. Hepatology. 2022;75(6):1590–603.

15. Hanna-Marja Voipio, P Baneux, I A Gomez De Segura, J Hau SW. Guidelines for the veterinary care of laboratory animals: Report of the FELASA/ECLAM/ESLAV Joint Working Group on Veterinary Care. Lab Anim. 2008;42(1):1–11.

16. Marquardt N, Feja M, Hünigen H, Plendl J, Menken L, Fink H, et al. Euthanasia of laboratory mice: Are isoflurane and sevoflurane real alternatives to carbon dioxide? PLoS One. 2018 ;13(9).
